# Supplementary material for: Chemical vapor deposition and phase stability of pyrite on SiO2
Source: Royal Society of Chemistry journal article supplement (doi:10.1039/c8tc00584b), 2018-01-01
Supplement: c8tc00584b1.pdf [file c8tc00584b1.pdf]

## Supplementary Information

### Chemical Vapor Deposition and Phase Stability of Pyrite on SiO<sub>2</sub>

Z. Mutlu<sup>a,b</sup>, B. Debnath<sup>b</sup>, S. Su<sup>b</sup>, C. Li<sup>a</sup>, M. Ozkan<sup>b</sup>, K. N. Bozhilov<sup>c</sup>, R. K. Lake<sup>b</sup>, and C. S. Ozkan<sup>a,d,\*</sup>

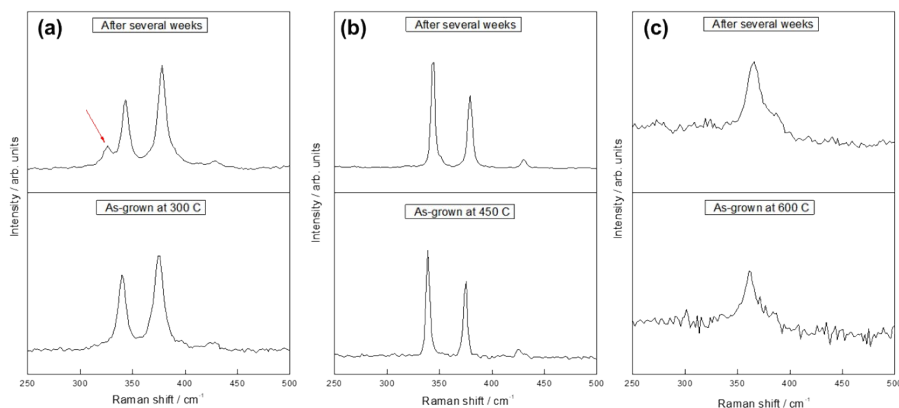

**Figure S1. Air stability of pyrite crystals.** Raman spectra comparison of the crystals grown at 300 C (a), 450 C (b), and 600 C (c) before and after exposed to air for several weeks.

**Table S1.** The shift (cm<sup>-1</sup>), height (a.u.), and full width at half maximum (FWHM; cm<sup>-1</sup>) values of the pyrite Raman peaks with changing laser power (mW).

| <b>Laser Power</b>                 |               | <b>5</b> | <b>15</b> | <b>25</b> | <b>35</b> |
|------------------------------------|---------------|----------|-----------|-----------|-----------|
| <b>Si</b>                          | <b>Shift</b>  | 523.74   | 523.70    | 523.75    | 523.681   |
|                                    | <b>Height</b> | 74.47    | 212.63    | 333.91    | 462.13    |
|                                    | <b>FWHM</b>   | 9.89     | 8.80      | 9.04      | 8.77901   |
| <b>T<sub>g</sub><sup>(3)</sup></b> | <b>Shift</b>  | 430.46   | 427.99    | 425.29    | 420.952   |
|                                    | <b>Height</b> | 13.75    | 37.03     | 47.68     | 47.8972   |
|                                    | <b>FWHM</b>   | 7.6939   | 5.79      | 7.67      | 9.44458   |
| <b>A<sub>g</sub></b>               | <b>Shift</b>  | 378.86   | 376.65    | 374.12    | 370.622   |
|                                    | <b>Height</b> | 157.30   | 472.93    | 825.98    | 1108.87   |
|                                    | <b>FWHM</b>   | 4.52     | 4.27      | 4.61      | 5.56911   |
| <b>E<sub>g</sub></b>               | <b>Shift</b>  | 343.02   | 341.64    | 340.00    | 337.836   |
|                                    | <b>Height</b> | 211.05   | 553.48    | 949.32    | 1256.3    |
|                                    | <b>FWHM</b>   | 4.44     | 4.65      | 4.67      | 4.94073   |
